# Supplementary material for: Extrapolation validation (EV): a universal validation method for mitigating machine learning extrapolation risk
Source: Royal Society of Chemistry journal article supplement (doi:10.1039/d3dd00256j), 2024-01-01
Supplement: d3dd00256j1.pdf [file d3dd00256j1.pdf]

1 **Supplementary Information for**

2 **Extrapolation Validation (EV): A Universal Validation Method**

3 **for Mitigating Machine Learning Extrapolation Risks**

4 Mengxian Yu<sup>1</sup>, Yin-Ning Zhou<sup>2</sup>, Qiang Wang<sup>1</sup>, Fangyou Yan<sup>1\*</sup>

5

6

7

8

9

10

11

12

13

14

15

16

17

18

19

20

21

22 **Text S1** Statistical parameters.

23 Statistical parameters are defined as follows:

24 Standard deviation ( $\sigma$ ): 
$$\sigma = \sqrt{\frac{1}{n} \sum_{i=1}^n (y - \frac{1}{n} \sum_{i=1}^n y)^2} \quad (\text{S1})$$

25 Coefficient of determination ( $R^2$ ): 
$$R^2 = 1 - \frac{\sum_{i=1}^n (y_{i,\text{exp}} - y_{i,\text{cal}})^2}{\sum_{i=1}^n (y_{i,\text{exp}} - \bar{y}_{\text{exp}})^2} \quad (\text{S2})$$

26 Root mean squared error (RMSE): 
$$\text{RMSE} = \sqrt{\frac{1}{n} \sum_{i=1}^n (y_{i,\text{exp}} - y_{i,\text{cal}})^2} \quad (\text{S3})$$

27 Mean absolute error (MAE): 
$$\text{MAE} = \frac{1}{n} \sum_{i=1}^n |y_{i,\text{exp}} - y_{i,\text{cal}}| \quad (\text{S4})$$

28 where,  $n$  is the numbers of samples.

29

30 **Text S2** Development of mathematical relationships models.

31 To establish ML models for multiple algorithms, the scikit-learn<sup>1</sup> version 1.3.0 package for  
32 Python<sup>2</sup> 3.11 was adopted to develop the MLR, LASSO, Ridge, GPR, MLP, AdaBoost, RF, GBDT,  
33 SVM, and KNN models, and the xgboost<sup>3</sup> version 1.7.6 package was applied to develop the XGBoost  
34 model. The independent variable data were standardized for modelling. The initial 33 ML models for  
35 the three datasets were established based on the default hyperparameters of a total of 11 ML  
36 algorithms within the scikit-learn<sup>1</sup> and xgboost<sup>3</sup> packages.

37 The phenomenon of extrapolation-failure was initially identified by analyzing the performance of  
38 the initial model training set, test (I) set, test (F) set, and test (B) set by  $R^2$ . Subsequently, the  
39 hyperparameters of 33 models were optimized (Figs. S1~S3) by exhaustive enumeration to observe  
40 the influence of hyperparameters on the performance of different algorithms. For selecting the model  
41 with the best extrapolation ability, the model with the smallest average value of  $MAE_{\text{training}}$ ,  $MAE_{\text{test(F)}}$   
42 and  $MAE_{\text{test(B)}}$  ( $(MAE_{\text{training}} + MAE_{\text{test(F)}} + MAE_{\text{test(B)}})/3$ ) statistical parameters within the tuned  
43 hyperparameters was taken as the optimal model (Tables S4, S6 and S8). To be clear, During the  
44 development of machine learning models containing the parameter “random\_state”, this  
45 parameter is always set to 1. The  $R^2$  of the optimal models for linear univariate, linear multivariate,  
46 and nonlinear multivariate data relationships of 11 ML algorithms further confirm the hypothesis that  
47 ML models involving tree algorithms may not have extrapolation ability.

48

49 **Table S1** Statistical results of the initial hyperparametric ML models for data with linear univariate

50 functional relationships.

| Model    | RMSE <sub>training</sub> | RMSE <sub>test(F)</sub> | RMSE <sub>test(I)</sub> | RMSE <sub>test(B)</sub> | $R^2_{\text{training}}$ | $R^2_{\text{test(F)}}$ | $R^2_{\text{test(I)}}$ | $R^2_{\text{test(B)}}$ |
|----------|--------------------------|-------------------------|-------------------------|-------------------------|-------------------------|------------------------|------------------------|------------------------|
| MLR      | 0.0000                   | 0.0000                  | 0.0000                  | 0.0000                  | 1.0000                  | 1.0000                 | 1.0000                 | 1.0000                 |
| Lasso    | 1.0000                   | 2.9627                  | 0.6703                  | 2.8991                  | 1.0000                  | 1.0000                 | 1.0000                 | 1.0000                 |
| Ridge    | 0.5754                   | 1.7048                  | 0.3857                  | 1.6682                  | 1.0000                  | 1.0000                 | 1.0000                 | 1.0000                 |
| SVM      | 98.4925                  | 500.1807                | 40.1207                 | 488.1564                | 0.8805                  | 0.8202                 | 0.9738                 | 0.8397                 |
| GPR      | 0.0001                   | 256.9459                | 0.0001                  | 6.2930                  | 1.0000                  | 0.3048                 | 1.0000                 | 0.9983                 |
| MLP      | 691.4459                 | 1146.0182               | 670.2223                | 200.2035                | 0.3231                  | 1.0000                 | 0.6214                 | 1.0000                 |
| AdaBoost | 6.0552                   | 249.8868                | 4.5307                  | 239.7142                | 0.9988                  | 0.0000                 | 0.9986                 | 0.0000                 |
| XGBoost  | 0.3888                   | 232.0081                | 0.4183                  | 220.4561                | 1.0000                  | 0.0000                 | 1.0000                 | 0.0000                 |
| RF       | 0.3940                   | 232.7778                | 0.3881                  | 220.9704                | 1.0000                  | 0.0000                 | 1.0000                 | 0.0000                 |
| KNN      | 0.3651                   | 235.2828                | 0.0000                  | 223.7365                | 1.0000                  | 0.0000                 | 1.0000                 | 0.0000                 |
| GBDT     | 1.0646                   | 232.1061                | 1.1254                  | 220.5793                | 1.0000                  | 0.0000                 | 0.9999                 | 0.0000                 |

52 **Table S2** Statistical results of the initial hyperparametric ML models for data with linear multivariate

53 functional relationships.

| Model    | $RMSE_{\text{training}}$ | $RMSE_{\text{test(F)}}$ | $RMSE_{\text{test(I)}}$ | $RMSE_{\text{test(B)}}$ | $R^2_{\text{training}}$ | $R^2_{\text{test(F)}}$ | $R^2_{\text{test(I)}}$ | $R^2_{\text{test(B)}}$ |
|----------|--------------------------|-------------------------|-------------------------|-------------------------|-------------------------|------------------------|------------------------|------------------------|
| MLR      | 0.0000                   | 0.0000                  | 0.0000                  | 0.0000                  | 1.0000                  | 1.0000                 | 1.0000                 | 1.0000                 |
| Lasso    | 1.0004                   | 1.9373                  | 0.6647                  | 5.3968                  | 1.0000                  | 1.0000                 | 1.0000                 | 1.0000                 |
| Ridge    | 0.7173                   | 7.8683                  | 0.5561                  | 158.4471                | 1.0000                  | 1.0000                 | 1.0000                 | 0.0560                 |
| SVM      | 44.3835                  | 297.7298                | 12.1532                 | 294.7730                | 0.9212                  | 0.9175                 | 0.9899                 | 0.5270                 |
| GPR      | 0.0001                   | 465.6339                | 0.0000                  | 102.1042                | 1.0000                  | 0.9062                 | 1.0000                 | 0.6258                 |
| MLP      | 394.8063                 | 576.1380                | 396.1819                | 336.3715                | 0.0783                  | 0.9997                 | 0.0910                 | 0.6676                 |
| AdaBoost | 3.8536                   | 151.9961                | 2.9115                  | 147.9956                | 0.9986                  | 0.0000                 | 0.9984                 | 0.0000                 |
| XGBoost  | 0.2246                   | 138.9467                | 0.2347                  | 137.0528                | 1.0000                  | 0.0000                 | 1.0000                 | 0.0000                 |
| RF       | 0.1703                   | 139.4360                | 0.1737                  | 137.3924                | 1.0000                  | 0.0000                 | 1.0000                 | 0.0000                 |
| KNN      | 0.2211                   | 140.9398                | 0.0001                  | 139.0768                | 1.0000                  | 0.0000                 | 1.0000                 | 0.0000                 |
| GBDT     | 0.6509                   | 139.0176                | 0.6796                  | 137.1404                | 1.0000                  | 0.0000                 | 0.9999                 | 0.0000                 |

55 **Table S3** Statistical results of the initial hyperparametric ML models for data with nonlinear

56 multivariate functional relationships.

| Model    | RMSE <sub>training</sub> | RMSE <sub>test(F)</sub> | RMSE <sub>test(I)</sub> | RMSE <sub>test(B)</sub> | $R^2_{\text{training}}$ | $R^2_{\text{test(F)}}$ | $R^2_{\text{test(I)}}$ | $R^2_{\text{test(B)}}$ |
|----------|--------------------------|-------------------------|-------------------------|-------------------------|-------------------------|------------------------|------------------------|------------------------|
| MLR      | 0.0000                   | 0.0038                  | 0.0000                  | 2.4726                  | 1.0000                  | 1.0000                 | 1.0000                 | 0.9996                 |
| Lasso    | 1.0100                   | 0.7533                  | 0.7541                  | 57.6987                 | 1.0000                  | 1.0000                 | 1.0000                 | 0.9246                 |
| Ridge    | 0.7746                   | 7.3083                  | 0.5963                  | 126.6090                | 1.0000                  | 1.0000                 | 1.0000                 | 0.0378                 |
| SVM      | 63.2524                  | 362.8745                | 20.7764                 | 381.9859                | 0.8992                  | 0.9132                 | 0.9830                 | 0.5085                 |
| GPR      | 0.0001                   | 589.5278                | 0.0000                  | 143.2726                | 1.0000                  | 0.9078                 | 1.0000                 | 0.6095                 |
| MLP      | 535.0079                 | 778.6396                | 534.5355                | 340.9841                | 0.0708                  | 0.9998                 | 0.0839                 | 0.6845                 |
| AdaBoost | 4.9844                   | 181.0609                | 4.1720                  | 197.7776                | 0.9985                  | 0.0000                 | 0.9979                 | 0.0000                 |
| XGBoost  | 0.2602                   | 166.3100                | 0.2871                  | 182.8309                | 1.0000                  | 0.0000                 | 1.0000                 | 0.0000                 |
| RF       | 0.2070                   | 166.9202                | 0.2073                  | 183.3232                | 1.0000                  | 0.0000                 | 1.0000                 | 0.0000                 |
| KNN      | 0.2753                   | 168.7369                | 0.0004                  | 185.4687                | 1.0000                  | 0.0000                 | 1.0000                 | 0.0000                 |
| GBDT     | 0.8094                   | 166.4499                | 0.8436                  | 182.9998                | 1.0000                  | 0.0000                 | 0.9999                 | 0.0000                 |

58 **Table S4** Optimal hyperparameters of the optimal ML models for data with linear univariate  
 59 functional relationships.

| Model    | Parameters                                                                |
|----------|---------------------------------------------------------------------------|
| Lasso    | max_iter = 100                                                            |
| Ridge    | alpha = 0.1, max_iter = 100                                               |
| SVM      | C = 51, gamma = 0.001, kernel = 'linear'                                  |
| GPR      | kernel=2**2 * DotProduct(sigma_0=4)                                       |
| MLP      | activation = 'identity', hidden_layer_sizes = (210, 10), solver = 'lbfgs' |
| AdaBoost | learning_rate = 0.11, n_estimators = 200                                  |
| XGBoost  | learning_rate = 0.19, max_depth = 7, n_estimators = 600                   |
| RF       | max_depth = 9, n_estimators = 10                                          |
| KNN      | n_neighbors = 1                                                           |
| GBDT     | learning_rate = 0.05, max_depth = 5, n_estimator = 600                    |

61 **Table S5** Statistical results of the optimal ML models for data with linear univariate functional

62 relationships.

| Model    | $RMSE_{\text{training}}$ | $RMSE_{\text{test(F)}}$ | $RMSE_{\text{test(I)}}$ | $RMSE_{\text{test(B)}}$ | $R^2_{\text{training}}$ | $R^2_{\text{test(F)}}$ | $R^2_{\text{test(I)}}$ | $R^2_{\text{test(B)}}$ |
|----------|--------------------------|-------------------------|-------------------------|-------------------------|-------------------------|------------------------|------------------------|------------------------|
| MLR      | 0.0000                   | 0.0000                  | 0.0000                  | 0.0000                  | 1.0000                  | 1.0000                 | 1.0000                 | 1.0000                 |
| Lasso    | 0.1000                   | 0.2963                  | 0.0670                  | 0.2899                  | 1.0000                  | 1.0000                 | 1.0000                 | 1.0000                 |
| Ridge    | 0.0577                   | 0.1710                  | 0.0387                  | 0.1673                  | 1.0000                  | 1.0000                 | 1.0000                 | 1.0000                 |
| SVM      | 0.0579                   | 0.1716                  | 0.0388                  | 0.1679                  | 1.0000                  | 1.0000                 | 1.0000                 | 1.0000                 |
| GPR      | 0.0000                   | 0.0000                  | 0.0000                  | 0.0000                  | 1.0000                  | 1.0000                 | 1.0000                 | 1.0000                 |
| MLP      | 0.0000                   | 0.0000                  | 0.0000                  | 0.0000                  | 1.0000                  | 1.0000                 | 1.0000                 | 1.0000                 |
| AdaBoost | 10.1147                  | 259.6758                | 7.4628                  | 249.4922                | 0.9966                  | 0.0000                 | 0.9959                 | 0.0000                 |
| XGBoost  | 0.0035                   | 231.8071                | 0.0039                  | 220.2600                | 1.0000                  | 0.0000                 | 1.0000                 | 0.0000                 |
| RF       | 0.5990                   | 232.6736                | 0.6088                  | 220.4324                | 1.0000                  | 0.0000                 | 1.0000                 | 0.0000                 |
| KNN      | 0.0000                   | 231.8060                | 0.0000                  | 220.2589                | 1.0000                  | 0.0000                 | 1.0000                 | 0.0000                 |
| GBDT     | 0.0000                   | 231.8060                | 0.0000                  | 220.2589                | 1.0000                  | 0.0000                 | 1.0000                 | 0.0000                 |



64 **Table S6** Optimal hyperparameters of the optimal ML models for data with linear multivariate

65 functional relationships.

| Model    | Parameters                                                                                |
|----------|-------------------------------------------------------------------------------------------|
| Lasso    | alpha = 0.3, max_iter = 100, tol = 0.0002                                                 |
| Ridge    | alpha = 1.9, max_iter = 100                                                               |
| SVM      | C = 191, gamma = 0.001, kernel = 'linear'                                                 |
| GPR      | kernel=2**2 * DotProduct(sigma_0=3)                                                       |
| MLP      | activation = 'identity', alpha = 0.0005, hidden_layer_sizes = (110, 10), solver = 'lbfgs' |
| AdaBoost | learning_rate = 0.13, n_estimators = 200                                                  |
| XGBoost  | learning_rate = 0.13, max_depth = 7, n_estimators = 900                                   |
| RF       | max_depth = 9, max_features = 4, n_estimators = 10                                        |
| KNN      | n_neighbors = 1                                                                           |
| GBDT     | learning_rate = 0.05, max_depth = 5, n_estimator = 500                                    |

67 **Table S7** Statistical results of the optimal ML models for data with linear multivariate functional

68 relationships.

| Model    | $RMSE_{\text{training}}$ | $RMSE_{\text{test(F)}}$ | $RMSE_{\text{test(I)}}$ | $RMSE_{\text{test(B)}}$ | $R^2_{\text{training}}$ | $R^2_{\text{test(F)}}$ | $R^2_{\text{test(I)}}$ | $R^2_{\text{test(B)}}$ |
|----------|--------------------------|-------------------------|-------------------------|-------------------------|-------------------------|------------------------|------------------------|------------------------|
| MLR      | 0.0000                   | 0.0000                  | 0.0000                  | 0.0000                  | 1.0000                  | 1.0000                 | 1.0000                 | 1.0000                 |
| Lasso    | 0.3048                   | 0.2207                  | 0.2088                  | 3.9420                  | 1.0000                  | 1.0000                 | 1.0000                 | 0.9978                 |
| Ridge    | 1.2107                   | 10.8737                 | 0.9283                  | 113.7655                | 0.9999                  | 1.0000                 | 0.9999                 | 0.0008                 |
| SVM      | 0.0700                   | 0.9778                  | 0.0758                  | 37.3265                 | 1.0000                  | 1.0000                 | 1.0000                 | 0.7957                 |
| GPR      | 0.0000                   | 0.0000                  | 0.0000                  | 0.0001                  | 1.0000                  | 1.0000                 | 1.0000                 | 1.0000                 |
| MLP      | 0.0006                   | 0.0244                  | 0.0005                  | 5.2772                  | 1.0000                  | 1.0000                 | 1.0000                 | 0.9967                 |
| AdaBoost | 5.7320                   | 156.6871                | 4.0441                  | 153.0914                | 0.9970                  | 0.0000                 | 0.9968                 | 0.0000                 |
| XGBoost  | 0.0036                   | 138.8537                | 0.0040                  | 136.9603                | 1.0000                  | 0.0000                 | 1.0000                 | 0.0000                 |
| RF       | 0.3001                   | 139.3735                | 0.2986                  | 137.0648                | 1.0000                  | 0.0000                 | 1.0000                 | 0.0000                 |
| KNN      | 0.0000                   | 138.8526                | 0.0000                  | 136.9591                | 1.0000                  | 0.0000                 | 1.0000                 | 0.0000                 |
| GBDT     | 0.0000                   | 138.8526                | 0.0000                  | 136.9591                | 1.0000                  | 0.0000                 | 1.0000                 | 0.0000                 |

70 **Table S8** Optimal hyperparameters of the optimal ML models for data with nonlinear multivariate

71 functional relationships.

| Model    | Parameters                                                                                 |
|----------|--------------------------------------------------------------------------------------------|
| Lasso    | alpha = 1.7, max_iter = 600                                                                |
| Ridge    | alpha = 1.9, max_iter = 100                                                                |
| SVM      | C = 101, gamma = 0.011, kernel = 'sigmoid'                                                 |
| GPR      | kernel=1**2 * DotProduct(sigma_0=2)                                                        |
| MLP      | activation = 'identity', alpha = 0.0007, hidden_layer_sizes = (210, 310), solver = 'lbfgs' |
| AdaBoost | learning_rate = 0.15, n_estimators = 200                                                   |
| XGBoost  | learning_rate = 0.17, max_depth = 7, n_estimators = 700                                    |
| RF       | max_depth = 9, max_features = 5, n_estimators = 10                                         |
| KNN      | n_neighbors = 1                                                                            |
| GBDT     | learning_rate = 0.19, max_depth = 7, n_estimator = 200                                     |

73 **Table S9** Statistical results of the optimal ML models for data with nonlinear multivariate functional

74 relationships.

| Model    | RMSE <sub>training</sub> | RMSE <sub>test(F)</sub> | RMSE <sub>test(I)</sub> | RMSE <sub>test(B)</sub> | $R^2_{\text{training}}$ | $R^2_{\text{test(F)}}$ | $R^2_{\text{test(I)}}$ | $R^2_{\text{test(B)}}$ |
|----------|--------------------------|-------------------------|-------------------------|-------------------------|-------------------------|------------------------|------------------------|------------------------|
| MLR      | 0.0000                   | 0.0038                  | 0.0000                  | 2.4726                  | 1.0000                  | 1.0000                 | 1.0000                 | 0.9996                 |
| Lasso    | 1.7006                   | 3.0380                  | 1.1622                  | 4.7048                  | 1.0000                  | 1.0000                 | 1.0000                 | 0.9990                 |
| Ridge    | 1.3402                   | 10.6818                 | 1.0273                  | 76.6308                 | 0.9999                  | 1.0000                 | 1.0000                 | 0.4168                 |
| SVM      | 0.5614                   | 8.3121                  | 0.2512                  | 24.8271                 | 1.0000                  | 1.0000                 | 1.0000                 | 0.9576                 |
| GPR      | 0.0000                   | 0.0038                  | 0.0000                  | 2.4724                  | 1.0000                  | 1.0000                 | 1.0000                 | 0.9996                 |
| MLP      | 0.0038                   | 0.0901                  | 0.0034                  | 0.3379                  | 1.0000                  | 1.0000                 | 1.0000                 | 1.0000                 |
| AdaBoost | 7.1512                   | 187.5066                | 5.1517                  | 204.2875                | 0.9970                  | 0.0000                 | 0.9966                 | 0.0000                 |
| XGBoost  | 0.0033                   | 166.2165                | 0.0035                  | 182.7721                | 1.0000                  | 0.0000                 | 1.0000                 | 0.0000                 |
| RF       | 0.3807                   | 166.8446                | 0.3883                  | 182.9056                | 1.0000                  | 0.0000                 | 1.0000                 | 0.0000                 |
| KNN      | 0.0000                   | 166.2155                | 0.0000                  | 182.7710                | 1.0000                  | 0.0000                 | 1.0000                 | 0.0000                 |
| GBDT     | 0.0000                   | 166.2155                | 0.0000                  | 182.7710                | 1.0000                  | 0.0000                 | 1.0000                 | 0.0000                 |

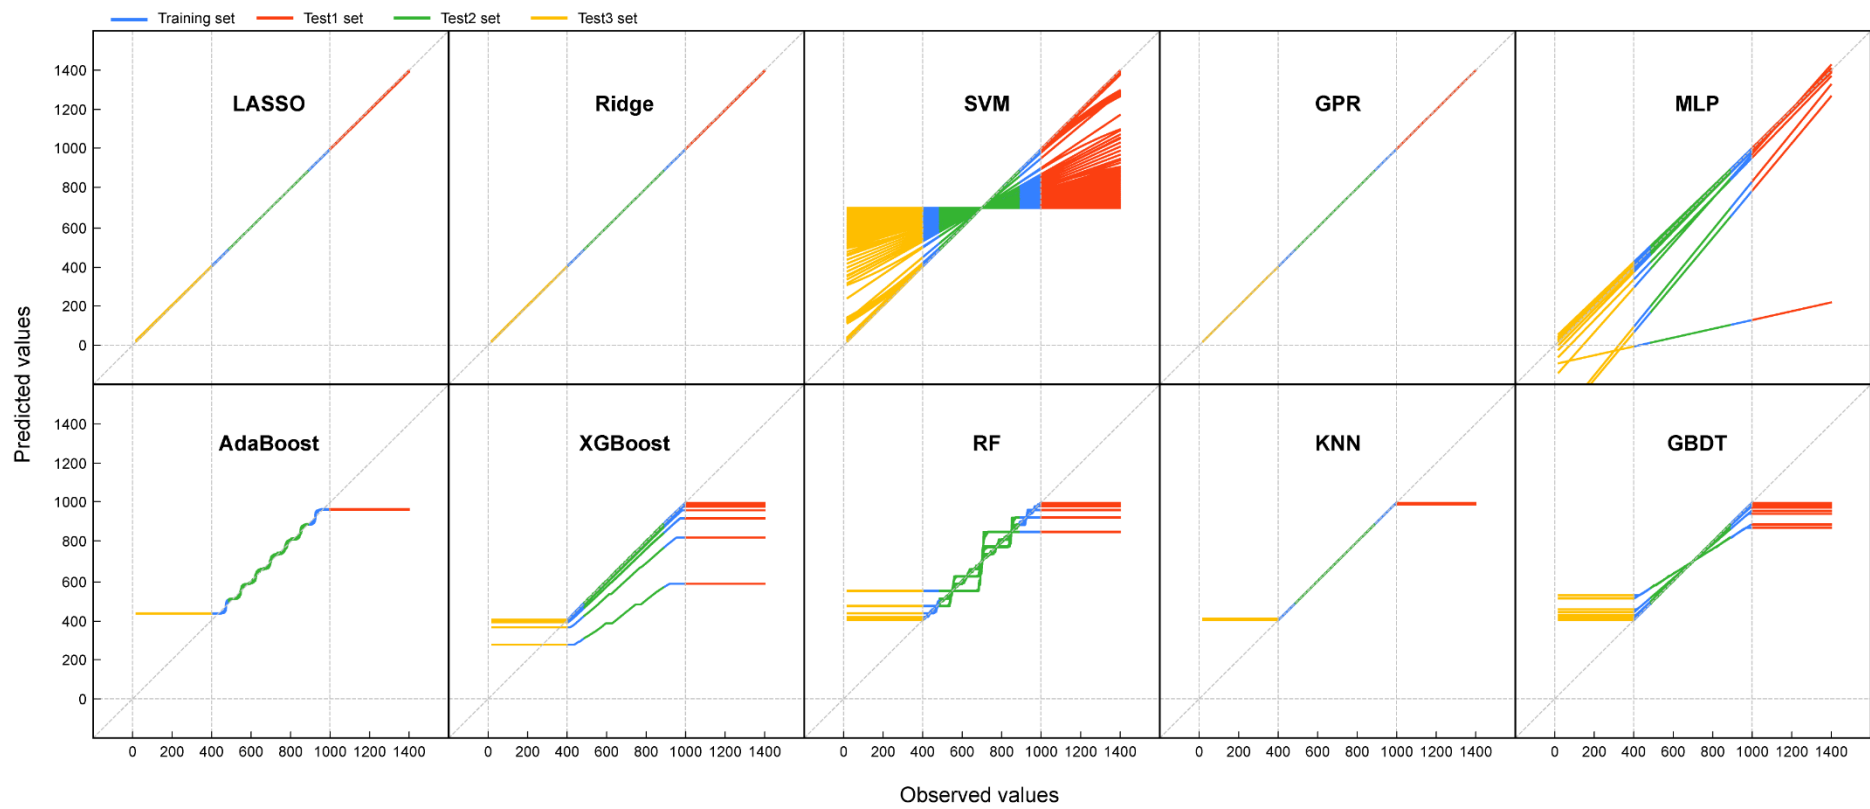

76

77

**Fig. S1** Hyperparametric adjustment process for linear univariate ML models.

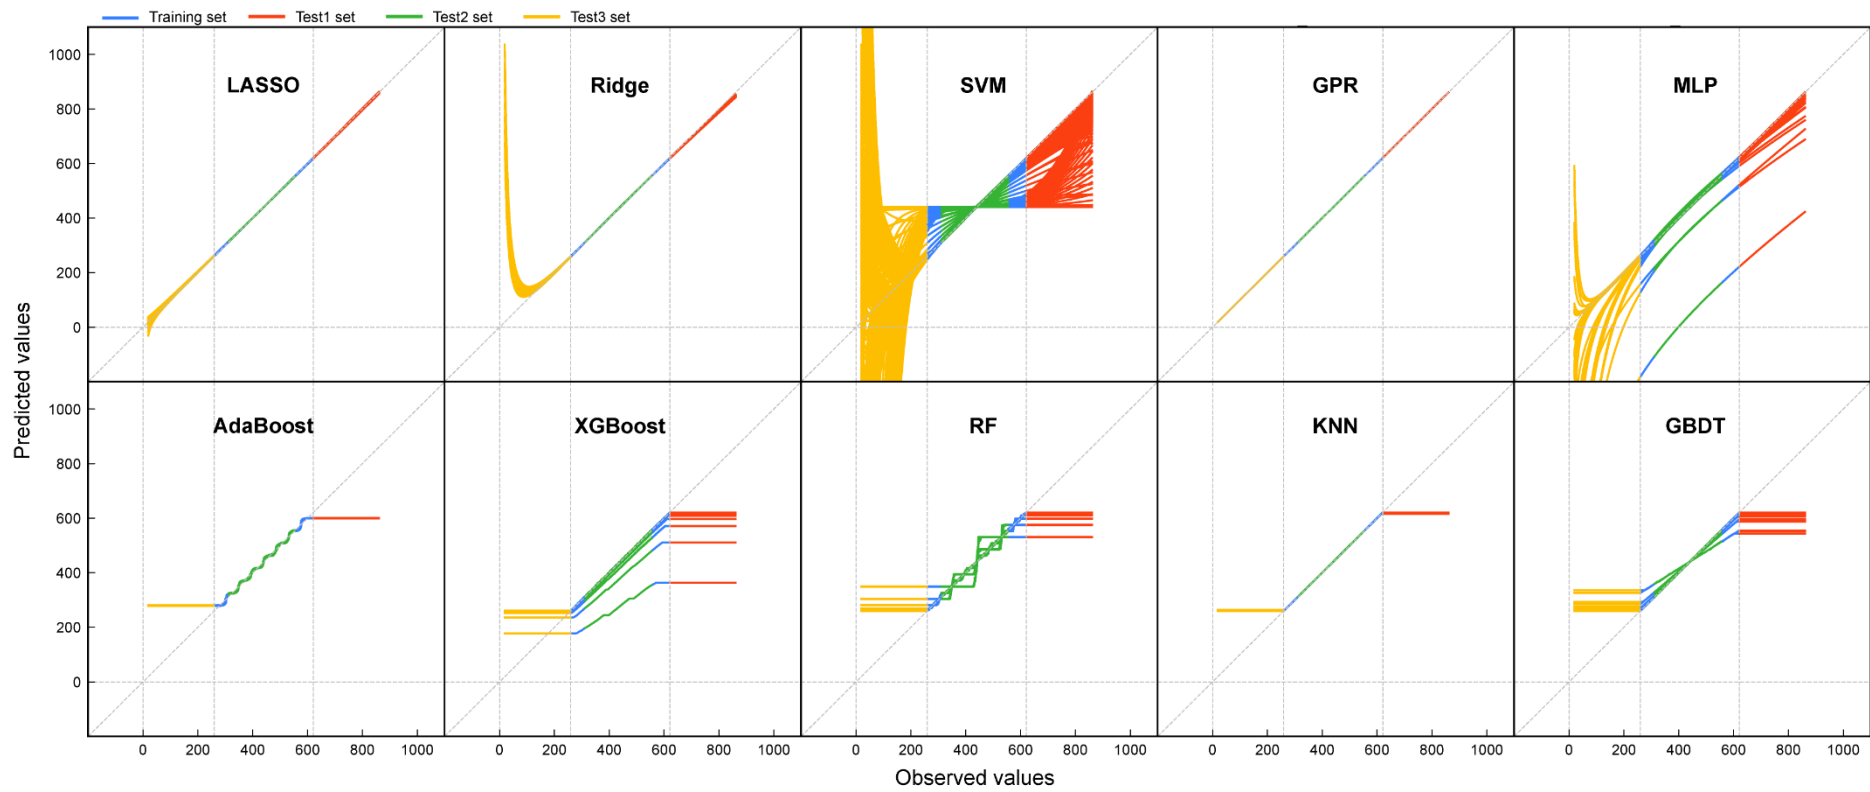

78

79

**Fig. S2** Hyperparametric adjustment process for linear multivariate ML models.

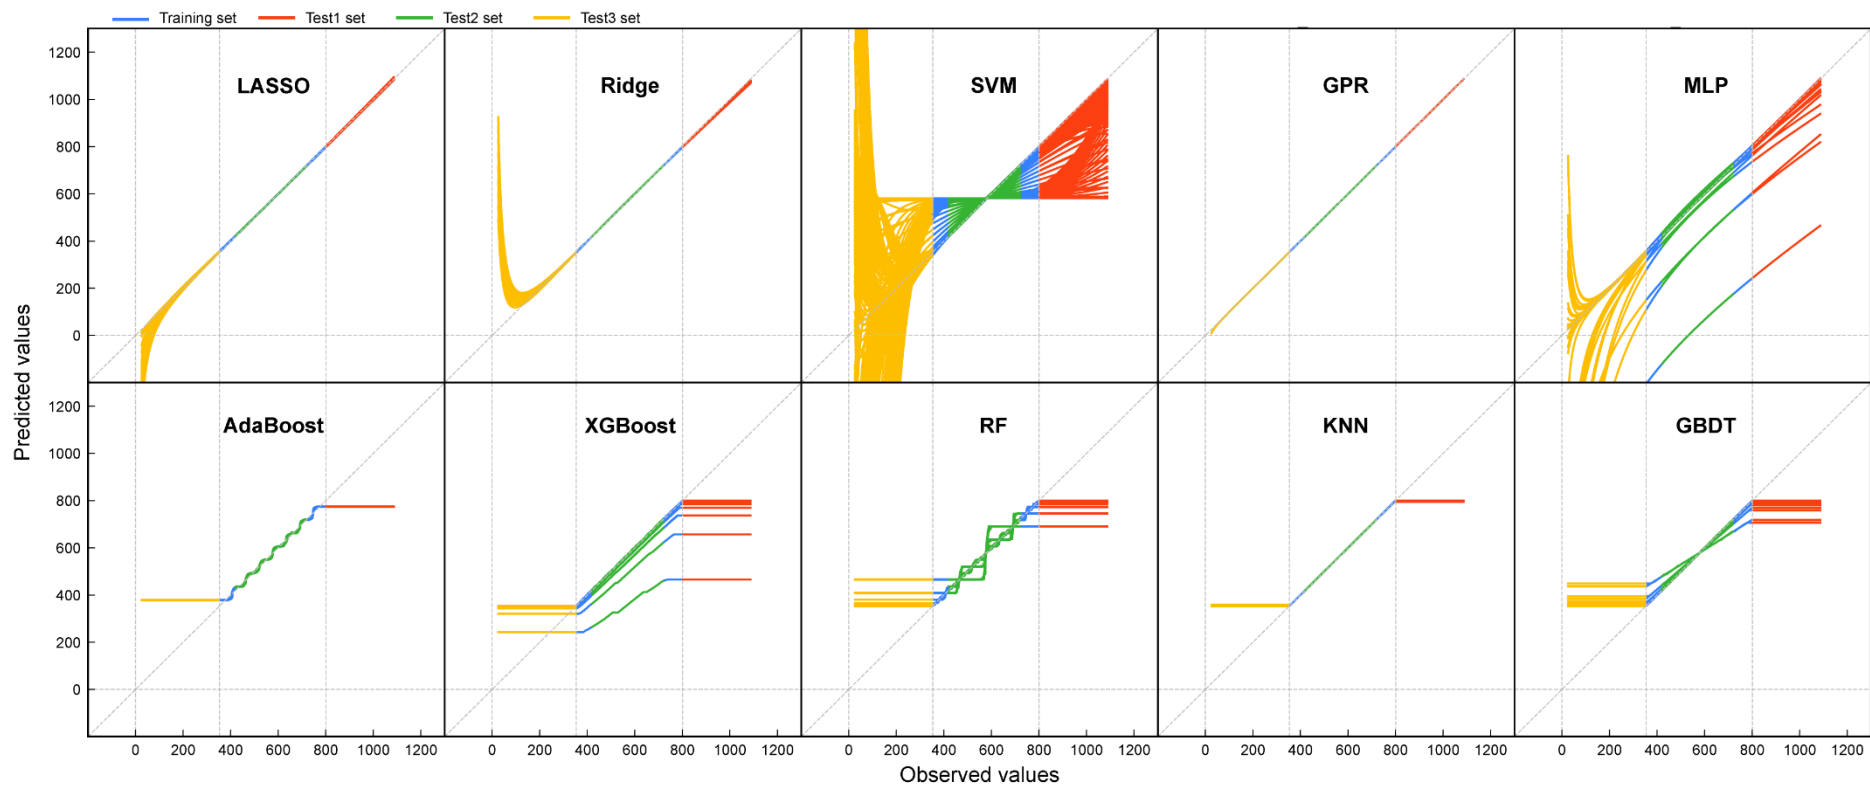

80

81

**Fig. S3** Hyperparametric adjustment process for nonlinear multivariate ML models.

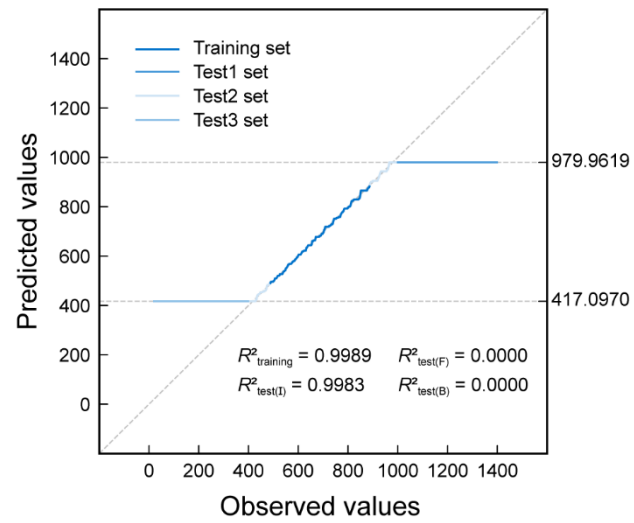

82

83 **Fig. S4** Example Random Forest (RF) model predicted values vs. observed values. Note: The RF model with linear univariate relationships dataset which has 10

84

DTs with a depth of 4 each ( $n_{\text{estimators}} = 10$ ,  $\text{max\_depth} = 4$ ).



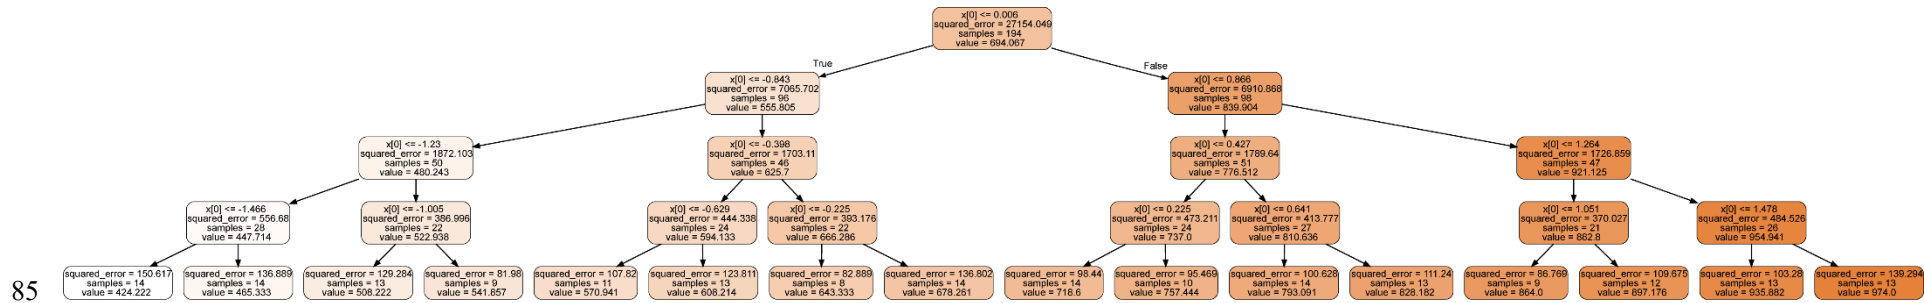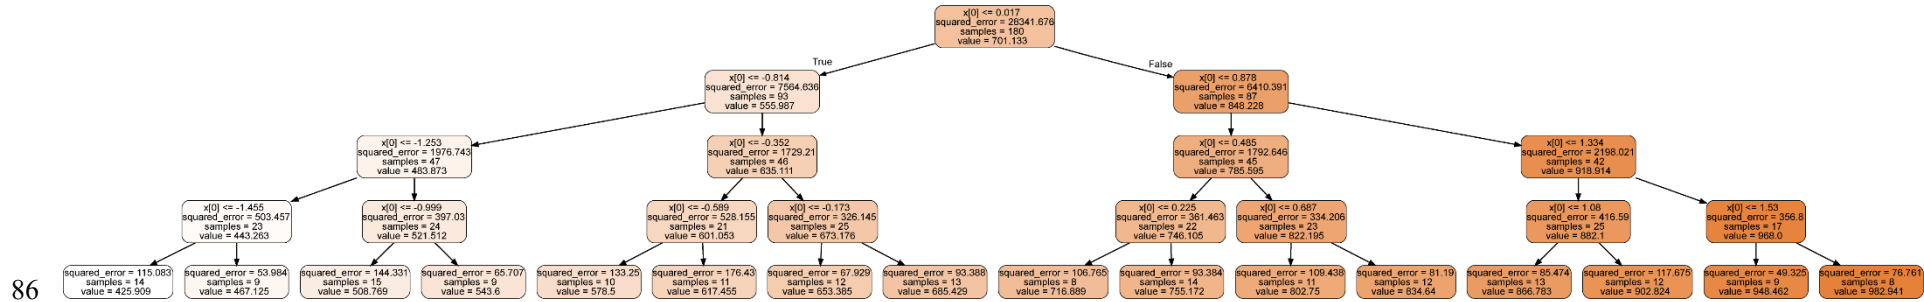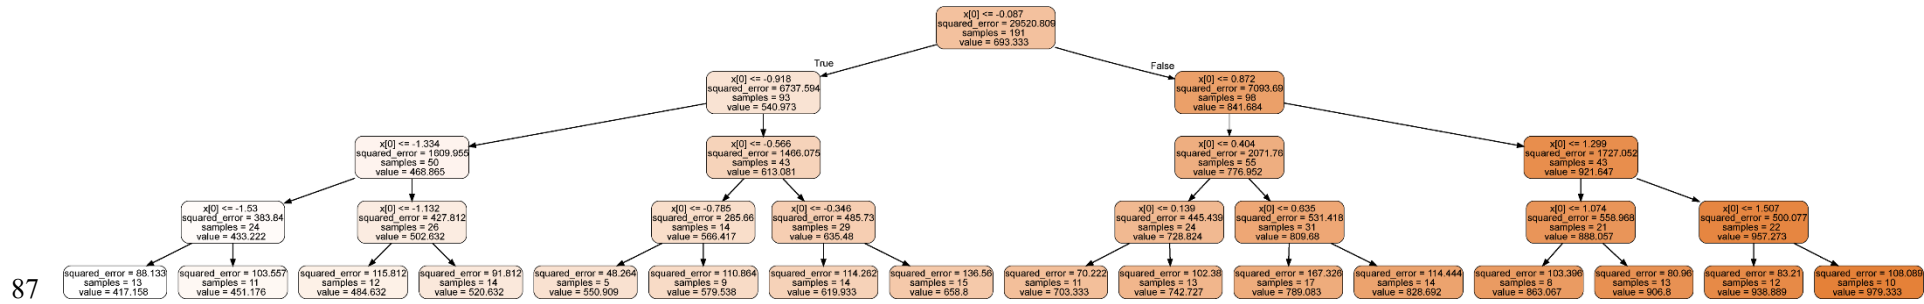

88

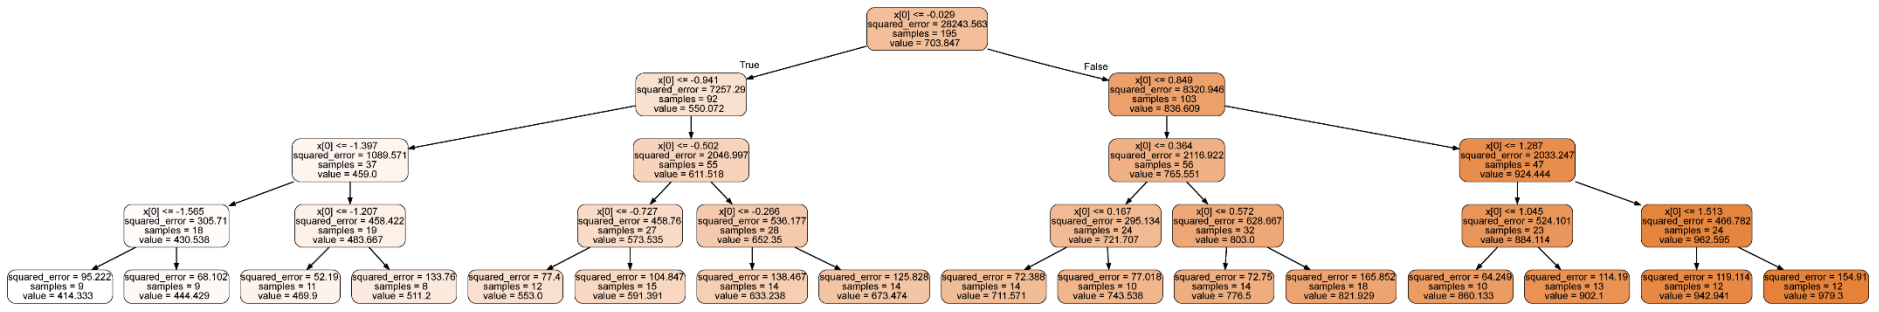

89

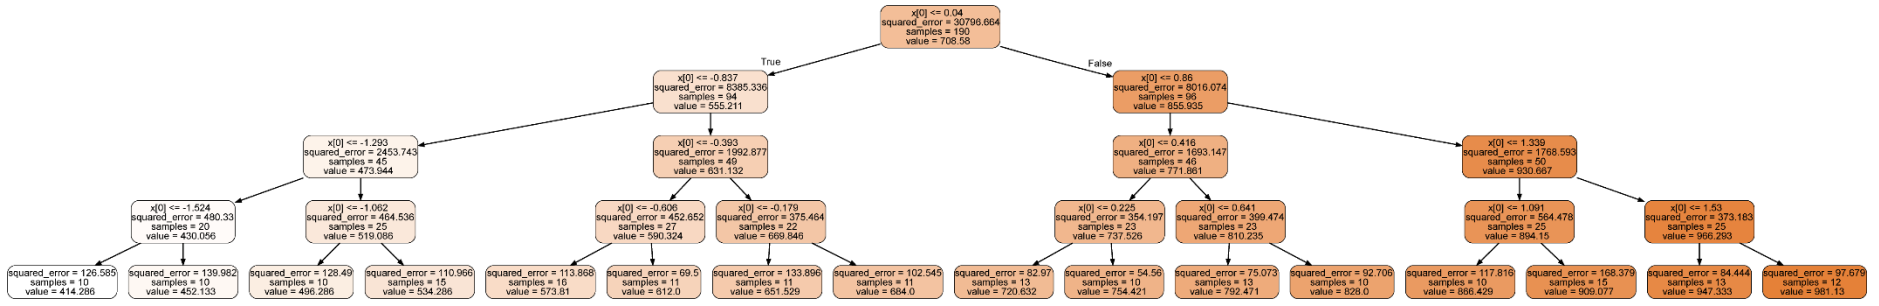

90

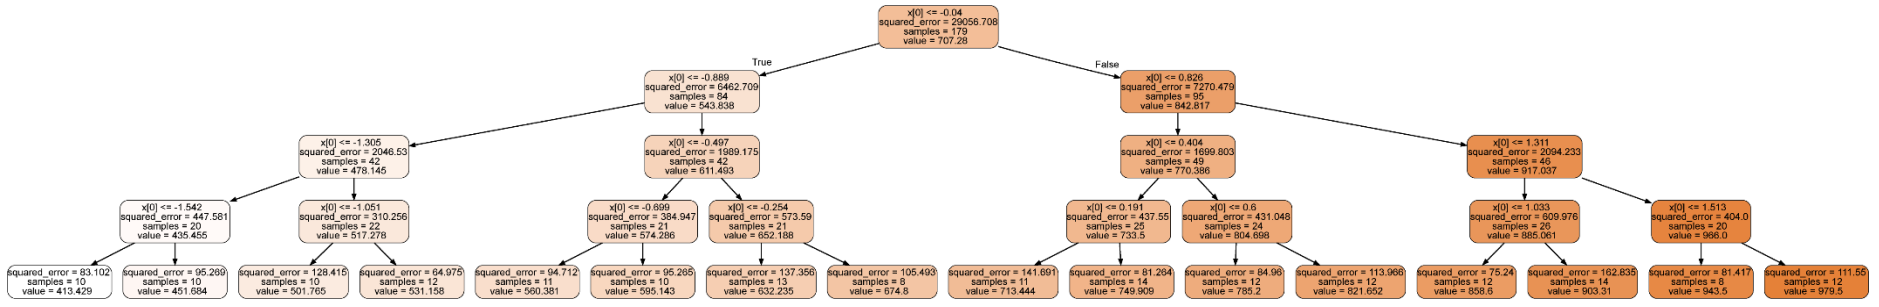

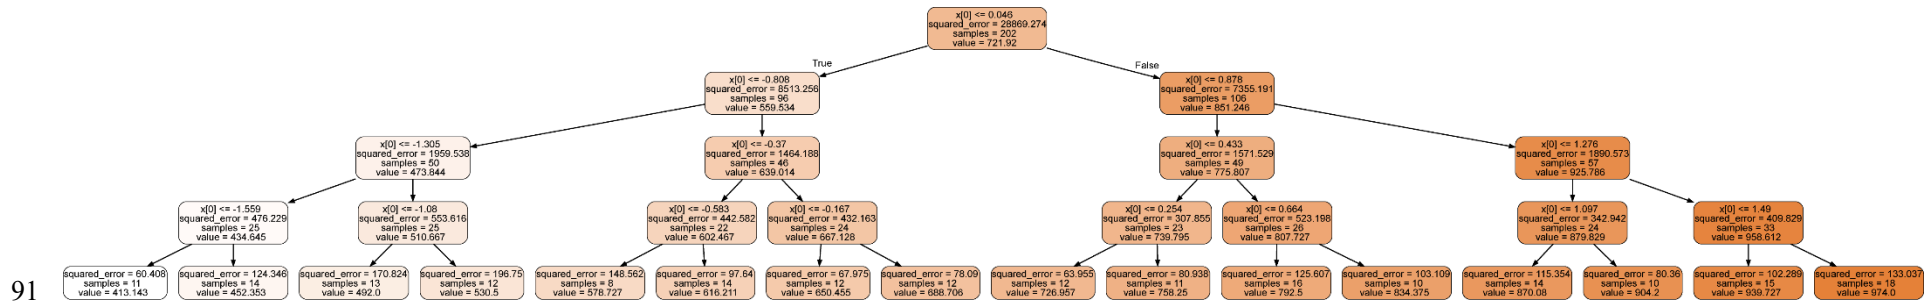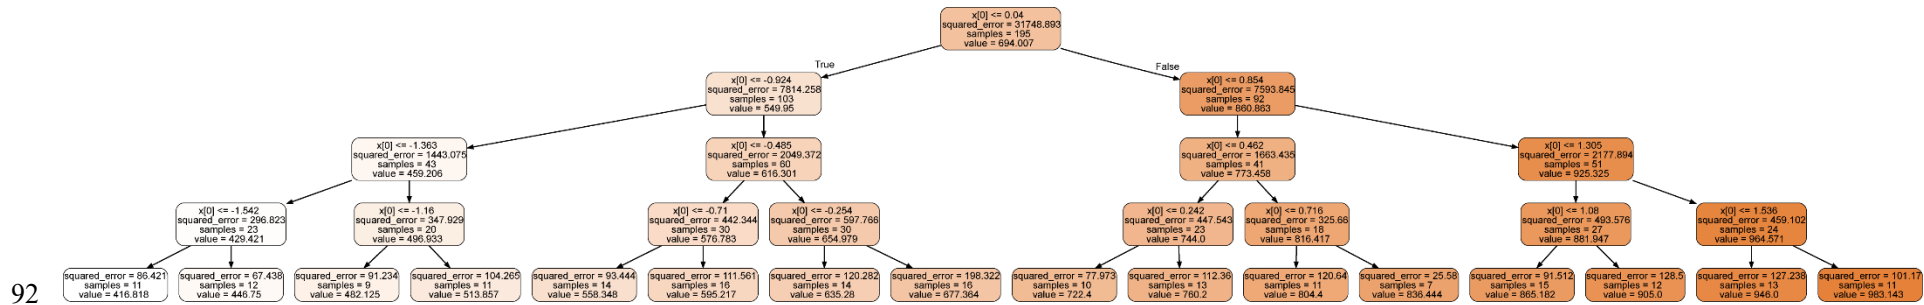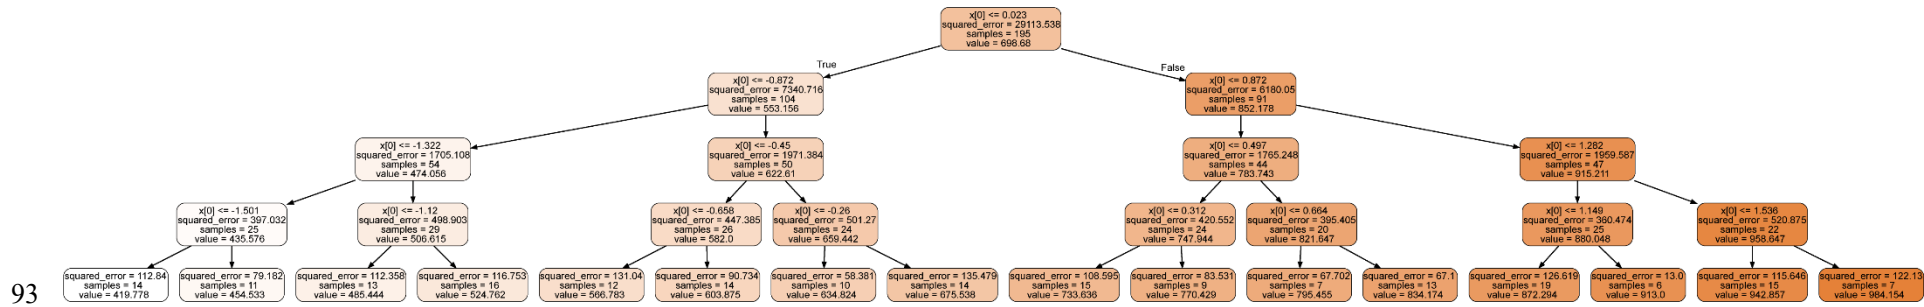

94

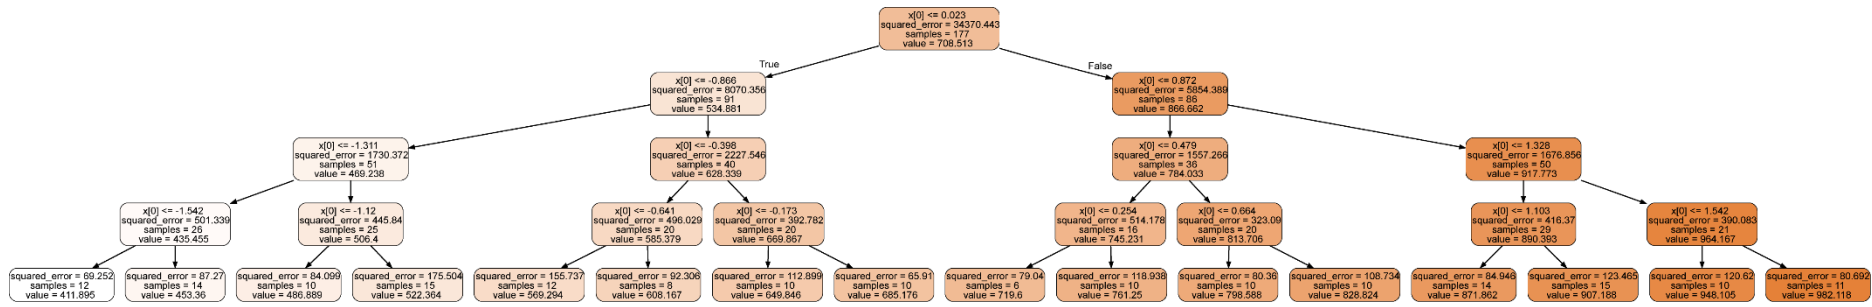

95

Fig. S5 10 decision trees (DTs) of example random forest (RF) model visualization.

96 **Text S3** Extrapolation validation of mathematical relationships models

97       Applying the EV method to evaluate the extrapolation ability of the three functional relations  
98 optimal model established by 11 ML algorithms. Serialized extrapolation was performed on the *h* and  
99 independent variables of the training set, and the training (EV) and test (EV) sets were re-divided in  
100 the ratio of 8:2, the ED was calculated and the extrapolation ability of the model was evaluated. (Figs.  
101 4a, b and c, Fig. S6 and S7).

102

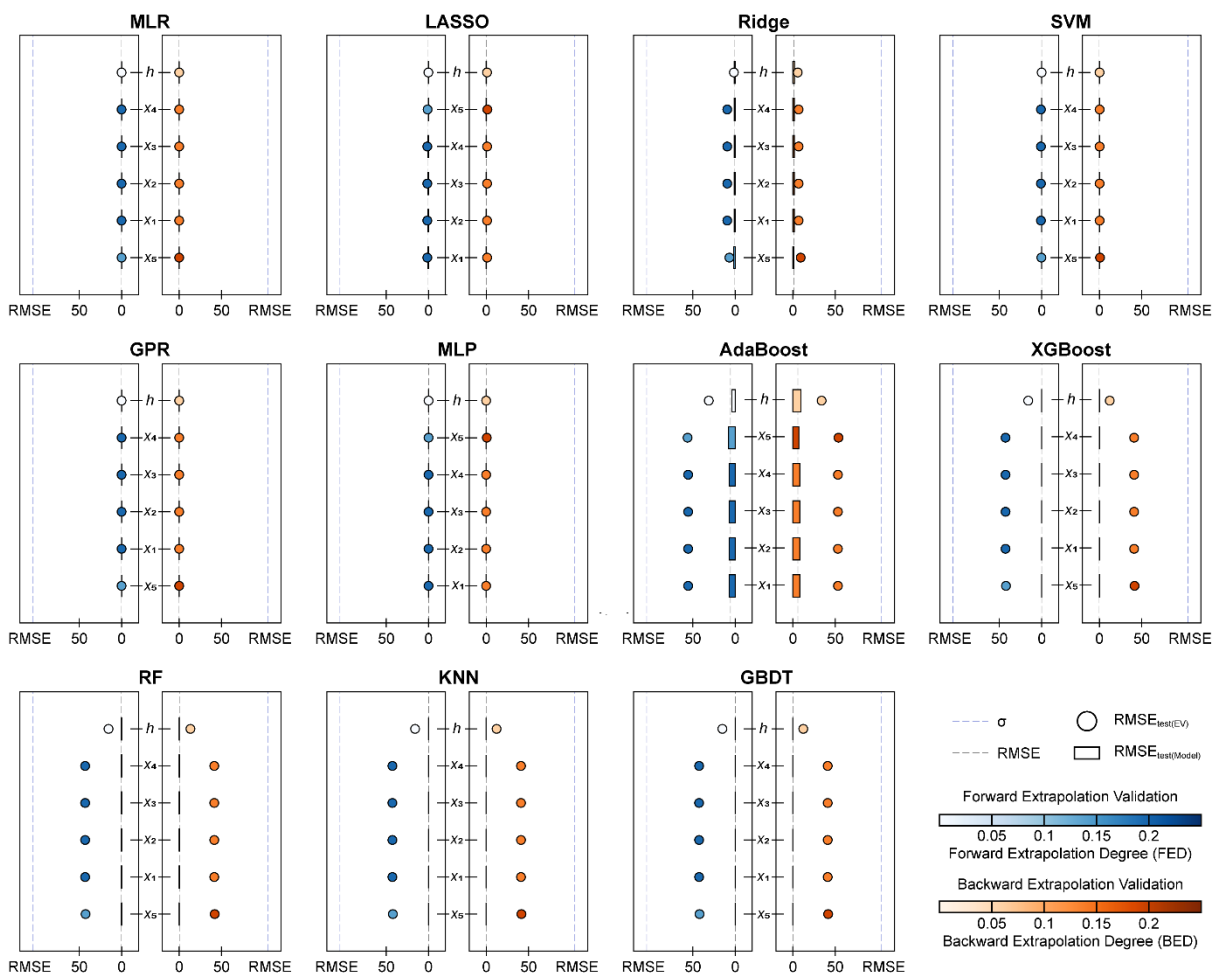

103

104 **Fig. S6** Extrapolation validation (EV) results of MLR, LASSO, Ridge, SVM, MLP, AdaBoost, RF, KNN,

105 GBDT and GPR Model for ML models developed with data from linear multivariate.

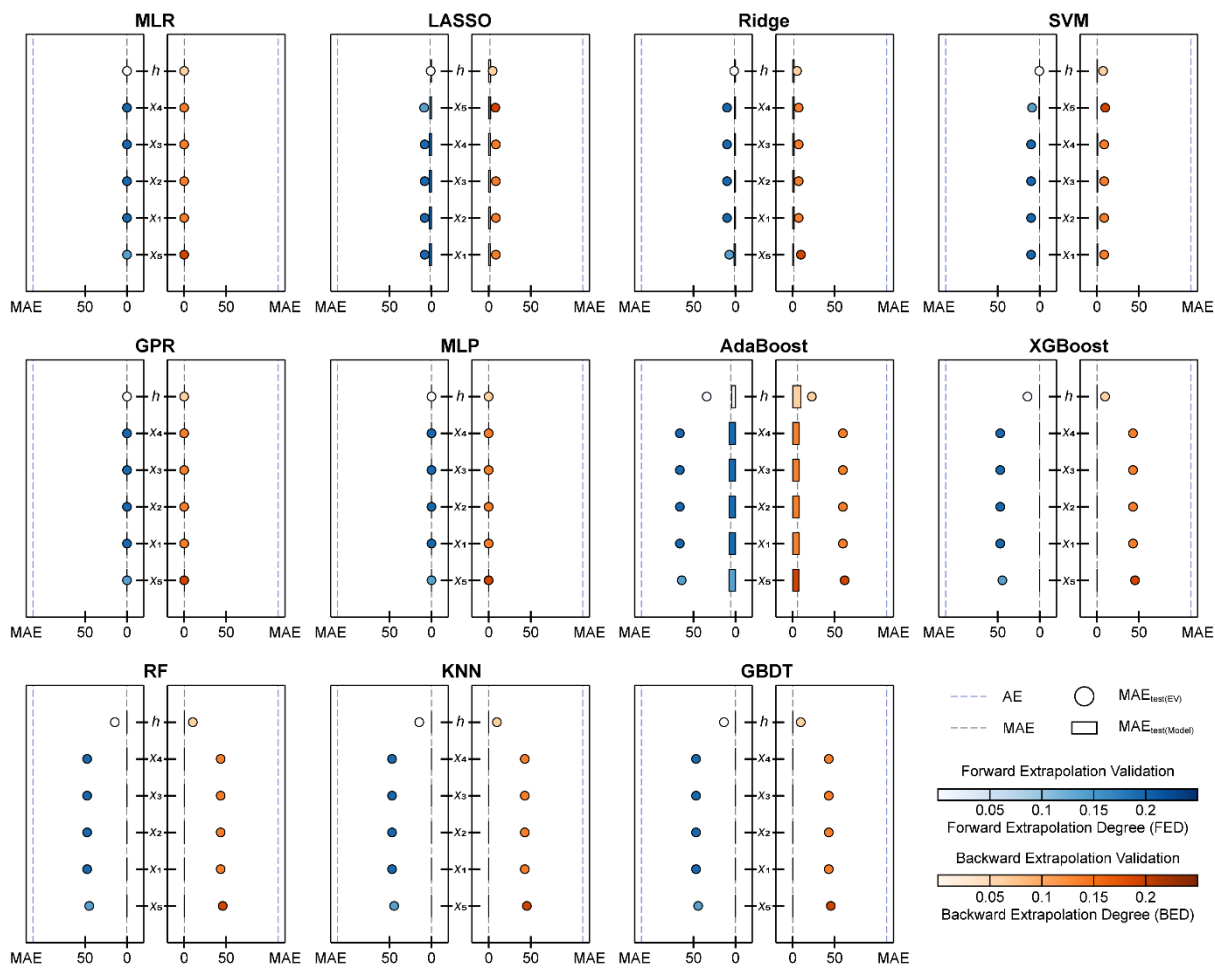

106

107 **Fig. S7** Extrapolation validation (EV) results of MLR, LASSO, Ridge, SVM, MLP, AdaBoost, RF, KNN,

108

GBDT and GPR Model for ML models developed with data from nonlinear multivariate.

109 **Text S4** Development of PI- $T_g$  models

110 The 29 norm indexes ( $I$ ) required for MLR models developed in the literature were calculated.  
111 With these 29  $I$ s as the independent variables and the PI glass transition temperature ( $T_g$ ) data  
112 provided in the literature as the dependent variables, 10 ML algorithmic models for LASSO, Ridge,  
113 GPR, MLP, AdaBoost, RF, GBDT, SVM, KNN and XGBoost were developed using scikit-learn<sup>1</sup>  
114 version 1.3.0 and xgboost<sup>3</sup> version 1.7.6. The  $I$  data were standardized for modelling. The ratio of the  
115 training set to the test set in the modeling is completely consistent with the settings in the literature.  
116 Using  $R^2$  and MAE as statistical parameters to evaluate the established model, the optimal model  
117 hyperparameters were determined with the best average performance between the training and test  
118 sets. (Table S10 and Fig. S8). To be clear, During the development of machine learning models  
119 containing the parameter “random\_state”, this parameter is always set to 1.

120



121 **Table S10** Hyperparameters of the PI- $T_g$  ML model developed in this study.

| Model    | Parameters                                                                               |
|----------|------------------------------------------------------------------------------------------|
| Lasso    | alpha = 0.042, tol = 0.0009                                                              |
| Ridge    | alpha = 0.99, max_iter = 100                                                             |
| SVM      | C = 750, epsilon = 1.3, gamma = 0.009, kernel = 'rbf'                                    |
| GPR      | kernel=kernel=2**2 * DotProduct(sigma_0=2) + WhiteKernel(noise_level=0.9)                |
| MLP      | activation = 'identity', alpha = 0.0001, hidden_layer_sizes = (150, 50), solver = 'adam' |
| AdaBoost | learning_rate = 0.9, n_estimators = 750                                                  |
| XGBoost  | learning_rate = 0.09, max_depth = 4, n_estimators = 280                                  |
| RF       | max_depth = 9, max_features = 9, n_estimators = 150                                      |
| KNN      | n_neighbors = 2                                                                          |
| GBDT     | learning_rate = 0.08, max_depth = 5, n_estimator = 250                                   |

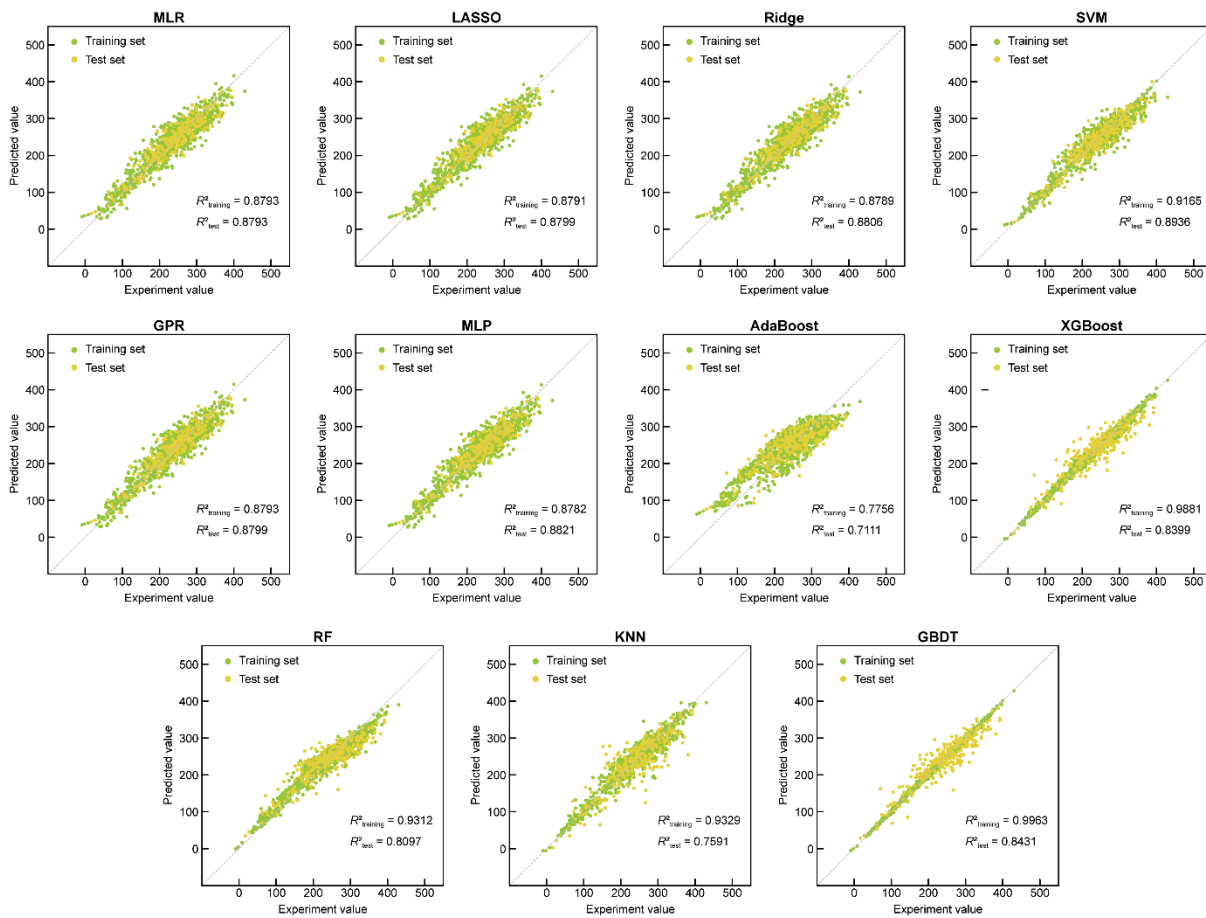

123

124

Fig. S8 PI- $T_g$  ML models predicted vs. experimental values.

125

126 **Text S5** Extrapolation validation of PI- $T_g$  models.

127       Evaluation of the extrapolation ability of 11 PI- $T_g$  models by using the EV method. Serialized  
128 extrapolation was performed on the  $h$  and  $Is$  of the training set, and the training (EV) and test (EV)  
129 sets were re-divided in the ratio of 8:2, the ED was calculated and the extrapolation ability of the  
130 model was evaluated.

131

132 **References**

133 1. Scikit-learn Scikit-learn. <https://scikit-learn.org/stable/>.

134 2. Python Python. [www.python.org/](http://www.python.org/).

135 3. xgboost xgboost. <https://xgboost.readthedocs.io/en/stable/>.

136 4. joblib joblib. <https://joblib.readthedocs.io/en/stable/>.

137
